# Supplementary material
Source: Research Square preprint supplement (doi:10.21203/rs.3.rs-7780476/v1)
Supplement: Supplementary file 1 [file 5cdb2abf64dbd4f89c2863a0.xlsx]

## Sheet: Contents
	S1	Intraclass correlations indicating variance in mental health service use due to school level variance for all models (1-14)
	S2	Fit statistics for all models (1-10)
	S3	Fixed and random effects of main models (1-3V3): raw estimates on log-odds scale
	S4	Fixed and random effects of time with learning materials (TWLM) models (4-7V3): raw estimates on log-odds scale
	S5	Fixed and random effects of gender models (8-10): raw estimates on log-odds scale
	S6	Odds ratios of fixed effects from all models (1-10) with corresponding confidence intervals
	S7	Variance decomposition: variances, correlations, covariances, between-cluster variances, ICC at 2 years of exposure, the reform's share of total school and child variances, Pearson's correlation between intercept and reform
	S8	Fit statistics for models with school structure interactions
	S9	School structure interactions: Results from interaction between learning materials and school structure variables
	S10	School structure covariates: Fixed and random effects from school structure interaction models
	S11	Model-fitting approach expanded
	S12	Results from models with expanded quarters in years, i.e., 2015Q1-2023Q4
	S13	Overview of diagnoses from KUHR - Based on ICPC-2 and ICD-10

## Sheet: S1 ICC Baseline
Model	School ICC Baseline
Effects of Learning Materials
1. Base: changes over time and between grades	0.0919128
2. Average effect of learning materials	0.0919973
3. Learning materials-by-school interaction	0.0955895
3. Learning materials-by-school interaction, adjusted for Covid-19	0.173496
3. Learning materials-by-school interaction, adjusted for municipality	0.0763004
Effects of Average Time with Learning Materials (TWLM)
4. Base: changes over time and between grades	0.0902932
5. Average effect of TWLM (linear)	0.0905522
6. Average effect of TWLM (linear and squared)	0.0905548
7. TWLM-by-school interaction	0.091356
7. TWLM-by-school interaction, adjusted for Covid-19	0.202093
7. TWLM-by-school interaction, adjusted for municipality	0.0564241
Gender Differences in Effects of Learning Materials
8. Base: interaction between gender and time, and gender and grade	0.0932143
9. Interaction between learning materials and gender	0.0933642
10. Interaction between learning materials and gender by school	0.111387

## Sheet: S2 Model fit stats
Model	nobs	nschools	nmunicip	AIC	BIC	logLik	deviance	Df.residual
Effects of Learning Materials
1. Base: changes over time and between grades	80840	2965	NA	271249	271407	-135607	271215	80823
2. Average effect of learning materials	80840	2965	NA	271218	271395	-135590	271180	80821
3. Learning materials-by-school interaction	80840	2965	NA	269452	269657	-134704	269408	80818
3. Learning materials-by-school interaction, adjusted for Covid-19	80840	2965	NA	267508	267750	-133728	267456	80814
3. Learning materials-by-school interaction, adjusted for municipality	79048	2710	357	264512	264772	-132228	264456	79020
Effects of Average Time with Learning Materials (TWLM)
4. Base: changes over time and between grades	138514	3017	NA	442930	443157	-221442	442884	138491
5. Average effect of TWLM (linear)	138514	3017	NA	442880	443126	-221415	442830	138489
6. Average effect of TWLM (linear and squared)	138514	3017	NA	442876	443132	-221412	442824	138488
7. TWLM-by-school interaction	138514	3017	NA	440357	440682	-220146	440291	138481
7. TWLM-by-school interaction, adjusted for Covid-19	138514	3017	NA	435342	435716	-217633	435266	138476
7. TWLM-by-school interaction, adjusted for municipality	135532	2714	357	433756	434179	-216835	433671	135489
Gender Differences in Effects of Learning Materials
8. Base: interaction between gender and time, and gender and grade	157388	2965	NA	399231	399520	-199586	399173	157359
9. Interaction between learning materials and gender	157388	2965	NA	399182	399511	-199558	399116	157355
10. Interaction between learning materials and gender by school	157388	2965	NA	394487	394936	-197199	394397	157343

## Sheet: S3 Main Results LM Effects
			Model 1		Model 2		Model 3		Model 3 V2 - Adjusting for Covid-19		Model 3 V3 - Adjusting for Municipality
RANDOM EFFECTS	School ID	Standard deviation of intercepts	0.577149		0.577354		0.589685		0.831036		0.52131
	School ID	Standard deviation of time quarter slopes	0.352403		0.351303		0.337751		0.349468		0.203004
	School ID	Standard deviation of learning materials slopes	NA		NA		0.34845		0.347895		0.339201
	School ID	Standard deviation of Covid-19 quarters slopes	NA		NA		NA		0.525745		NA
	School ID	Correlation between intercept and time quarter slopes	-0.544012		-0.54355		-0.515362		-0.694127		-0.710135
	School ID	Correlation between intercept and learning materials slopes	NA		NA		-0.279573		-0.157278		-0.262737
	School ID	Correlation between intercept and Covid-19 quarters slopes	NA		NA		NA		-0.734668		NA
	School ID	Correlation between time quarter slopes and learning materials slopes	NA		NA		0.0099382		-0.0501871		-0.132946
	School ID	Correlation between time quarter slopes and Covid-19 quarters slopes	NA		NA		NA		0.631263		NA
	School ID	Correlation between Covid-19 quarters slopes and learning materials slopes	NA		NA		NA		-0.0413079		NA
	Municipality ID	Standard deviation of intercepts	NA		NA		NA		NA		0.274776
	Municipality ID	Standard deviation of time quarter slopes	NA		NA		NA		NA		0.302058
	Municipality ID	Standard deviation of learning materials slopes	NA		NA		NA		NA		0.0613909
	Municipality ID	Correlation between intercept and time quarter slopes	NA		NA		NA		NA		-0.552869
	Municipality ID	Correlation between intercept and learning materials slopes	NA		NA		NA		NA		-0.00130616
	Municipality ID	Correlation between time quarter slopes and learning materials slopes	NA		NA		NA		NA		0.769748
FIXED EFFECTS			Log-odds (SE, CI)	z-value	Log-odds (SE, CI)	z-value	Log-odds (SE, CI)	z-value	Log-odds (SE, CI)	z-value	Log-odds (SE, CI)	z-value
		Baseline mental health service use (intercept)	-3.427 (0.015; 0.03–0.03)***	-226.999	-3.335 (0.023; 0.03–0.04)***	-148.194	-3.345 (0.023; 0.03–0.04)***	-146.787	-3.360 (0.023; 0.03–0.04)***	-148.524	-3.347 (0.028; 0.03–0.04)***	-120.092
		learn_materials1			-0.028 (0.010; 0.95–0.99)**	-2.77364	-0.034 (0.013; 0.94–0.99)**	-2.61836	-0.031 (0.013; 0.95–1.00)*	-2.3313	-0.073 (0.015; 0.90–0.96)***	-4.9405
		subject_guidelines1			-0.075 (0.013; 0.90–0.95)***	-5.84907	-0.082 (0.013; 0.90–0.94)***	-6.31232	-0.063 (0.013; 0.92–0.96)***	-4.82934	-0.083 (0.013; 0.90–0.94)***	-6.46405
		avg_gender_centered	-0.207 (0.030; 0.77–0.86)***	-6.95194	-0.206 (0.030; 0.77–0.86)***	-6.94622	-0.247 (0.032; 0.73–0.83)***	-7.61978	-0.250 (0.032; 0.73–0.83)***	-7.71205	-0.200 (0.032; 0.77–0.87)***	-6.15974
		grade_level10	0.362 (0.011; 1.41–1.47)***	33.3381	0.303 (0.017; 1.31–1.40)***	17.7823	0.299 (0.017; 1.30–1.39)***	17.4205	0.314 (0.017; 1.32–1.42)***	18.2763	0.317 (0.017; 1.33–1.42)***	19.0516
		grade_level6	0.060 (0.008; 1.04–1.08)***	7.41791	0.049 (0.009; 1.03–1.07)***	5.39914	0.055 (0.009; 1.04–1.08)***	6.00923	0.055 (0.009; 1.04–1.08)***	5.98763	0.053 (0.009; 1.04–1.07)***	5.74201
		grade_level7	0.091 (0.008; 1.08–1.11)***	11.316	0.062 (0.013; 1.04–1.09)***	4.76552	0.080 (0.014; 1.05–1.11)***	5.76896	0.079 (0.014; 1.05–1.11)***	5.70309	0.074 (0.014; 1.05–1.11)***	5.34401
		grade_level8	0.174 (0.011; 1.17–1.22)***	15.859	0.173 (0.011; 1.16–1.22)***	15.7523	0.192 (0.012; 1.18–1.24)***	16.1171	0.188 (0.012; 1.18–1.24)***	15.7268	0.202 (0.012; 1.20–1.25)***	17.2796
		grade_level9	0.280 (0.011; 1.30–1.35)***	25.6684	0.268 (0.012; 1.28–1.34)***	22.9744	0.278 (0.012; 1.29–1.35)***	23.2586	0.279 (0.012; 1.29–1.35)***	23.2561	0.287 (0.012; 1.30–1.36)***	24.543
		year_quarter2020Q4	0.345 (0.011; 1.38–1.44)***	31.5811	0.344 (0.011; 1.38–1.44)***	31.5185	0.344 (0.011; 1.38–1.44)***	31.5512	0.341 (0.011; 1.38–1.44)***	31.055	0.325 (0.012; 1.35–1.42)***	27.6507
		year_quarter2021Q1	0.502 (0.011; 1.62–1.69)***	44.8918	0.501 (0.011; 1.61–1.69)***	44.7766	0.501 (0.011; 1.61–1.69)***	44.9488	0.493 (0.011; 1.60–1.67)***	43.2107	0.463 (0.014; 1.55–1.63)***	32.7919
		year_quarter2021Q2	0.471 (0.012; 1.56–1.64)***	38.9627	0.469 (0.012; 1.56–1.64)***	38.8068	0.469 (0.012; 1.56–1.64)***	39.0972	0.455 (0.013; 1.54–1.62)***	36.2362	0.413 (0.018; 1.46–1.56)***	23.3326
		year_quarter2021Q3	0.473 (0.013; 1.56–1.65)***	35.9707	0.495 (0.014; 1.60–1.69)***	35.5235	0.498 (0.014; 1.60–1.69)***	36.1043	0.472 (0.015; 1.56–1.65)***	31.9263	0.423 (0.022; 1.46–1.59)***	19.0695
		year_quarter2021Q4	0.883 (0.014; 2.35–2.49)***	63.1172	0.904 (0.015; 2.40–2.54)***	61.55	0.909 (0.015; 2.41–2.55)***	62.6981	0.879 (0.015; 2.34–2.48)***	60.6208	0.818 (0.026; 2.15–2.39)***	31.3083
		year_quarter2022Q1	1.378 (0.015; 3.85–4.09)***	91.0224	1.398 (0.016; 3.92–4.17)***	88.7593	1.406 (0.016; 3.96–4.21)***	90.6616	1.393 (0.015; 3.91–4.14)***	94.376	1.296 (0.030; 3.44–3.88)***	42.7007
		year_quarter2022Q2	0.308 (0.018; 1.31–1.41)***	17.5192	0.327 (0.018; 1.34–1.44)***	18.118	0.335 (0.018; 1.35–1.45)***	18.8679	0.336 (0.017; 1.36–1.45)***	20.3253	0.208 (0.035; 1.15–1.32)***	5.88358

## Sheet: S4 Main Results TWLM
			Model 4 Baseline TWLM		Model 5 Fixed Linear TWLM		Model 6 Fixed Linear Squared TWLM		Model 7 TWLM-by-school		Model 7 TWLM V2 - Adjusting for Covid-19		Model 7 TWLM V3 - Adjusting for Municipality
RANDOM EFFECTS	School ID	Standard deviation of intercepts	0.5714		0.5723		0.5724		0.5751		0.9128		0.44355
	School ID	Standard deviation of time quarter slopes	0.1438		0.1439		0.1438		0.1859		0.3161		0.16872
	School ID	Standard deviation of TWLM-linear slopes	NA		NA		NA		0.3799		0.362		0.362
	School ID	Standard deviation of TWLM-squared slopes	NA		NA		NA		0.1127		0.1014		0.10212
	School ID	Standard deviation of Covid-19 quarters slopes	NA		NA		NA		NA		0.5708		NA
	School ID	Correlation between intercept and time quarter slopes	-0.49		-0.49		-0.49		-0.47		-0.8		-0.5
	School ID	Correlation between intercept and TWLM-linear slopes	NA		NA		NA		-0.01		0.03		-0.17
	School ID	Correlation between intercept and TWLM-squared slopes	NA		NA		NA		0.08		-0.02		0.39
	School ID	Correlation between intercept and Covid-19 quarters slopes	NA		NA		NA		NA		-0.79		NA
	School ID	Correlation between time quarter slopes and TWLM-linear slopes	NA		NA		NA		-0.31		-0.24		-0.22
	School ID	Correlation between time quarter slopes and TWLM-squared slopes	NA		NA		NA		-0.02		0.08		-0.19
	School ID	Correlation between TWLR-linear slopes and TWLM-squared slopes	NA		NA		NA		-0.87		NA		-0.88
	School ID	Correlation between time quarter slopes and Covid-19 quarters slopes	NA		NA		NA		NA		0.82		NA
	School ID	Correlation between Covid-19 quarters slopes and TWLM-linear slopes slopes	NA		NA		NA		NA		-0.1		NA
	School ID	Correlation between Covid-19 quarters slopes and TWLM-squared slopes slopes	NA		NA		NA		NA		0.17		NA
	School ID	Correlation between TWLR-linear slopes slopes and TWLM-squared slopes	NA		NA		NA		NA		-0.86		NA
	Municipality ID	Standard deviation of intercepts	NA		NA		NA		NA		NA		0.33957
	Municipality ID	Standard deviation of time quarter slopes	NA		NA		NA		NA		NA		0.05934
	Municipality ID	Standard deviation of TWLM-linear slopes	NA		NA		NA		NA		NA		0.11184
	Municipality ID	Standard deviation of TWLM-squared slopes	NA		NA		NA		NA		NA		0.04491
	Municipality ID	Correlation between intercept and time quarter slopes	NA		NA		NA		NA		NA		-0.7
	Municipality ID	Correlation between intercept and TWLM-linear slopes	NA		NA		NA		NA		NA		0.91
	Municipality ID	Correlation between intercept and TWLM-squared slopes	NA		NA		NA		NA		NA		-0.89
	Municipality ID	Correlation between time quarter slopes and TWLM-linear slopes	NA		NA		NA		NA		NA		-0.94
	Municipality ID	Correlation between time quarter slopes and TWLM-squared slopes	NA		NA		NA		NA		NA		0.88
	Municipality ID	Correlation between TWLM-linear slopes and TWLM-squared slopes	NA		NA		NA		NA		NA		-0.96
FIXED EFFECTS			Log-odds (SE, CI)	z-value	Log-odds (SE, CI)	z-value	Log-odds (SE, CI)	z-value	Log-odds (SE, CI)	z-value	Log-odds (SE, CI)	z-value	Log-odds (SE, CI)	z-value
		Baseline mental health service use (intercept)	-3.461 (0.015; 0.03–0.03)***	-236.115	-3.391 (0.017; 0.03–0.03)***	-194.659	-3.398 (0.018; 0.03–0.03)***	-192.098	-3.398 (0.018; 0.03–0.03)***	-190.338	-3.433 (0.018; 0.03–0.03)***	-191.612	-3.488 (0.026; 0.03–0.03)***	-133.413
		avg_time_with_learn_materials (TWLM)			0.000 (0.003; 0.99–1.01)	-0.0085	0.018 (0.008; 1.00–1.03)*	2.13964	0.013 (0.013; 0.99–1.04)	1.002	0.031 (0.012; 1.01–1.06)*	2.51611	-0.050 (0.016; 0.92–0.98)**	-3.23408
		avg_time_with_learn_materials_squared (TWLM^2)					-0.007 (0.003; 0.99–1.00)*	-2.26737	-0.004 (0.004; 0.99–1.00)	-0.952	-0.011 (0.004; 0.98–1.00)**	-2.78461	0.018 (0.005; 1.01–1.03)***	3.44568
		subject_guidelines1			-0.079 (0.011; 0.90–0.94)***	-7.42745	-0.076 (0.011; 0.91–0.95)***	-7.03832	-0.075 (0.011; 0.91–0.95)***	-6.911	-0.039 (0.011; 0.94–0.98)***	-3.53282	-0.071 (0.011; 0.91–0.95)***	-6.55849
		avg_gender_centered	-0.192 (0.023; 0.79–0.86)***	-8.263	-0.193 (0.023; 0.79–0.86)***	-8.27535	-0.193 (0.023; 0.79–0.86)***	-8.26677	-0.243 (0.025; 0.75–0.82)***	-9.627	-0.250 (0.025; 0.74–0.82)***	-9.86652	-0.211 (0.025; 0.77–0.85)***	-8.30315
		grade_level10	0.349 (0.009; 1.39–1.44)***	38.94	0.327 (0.009; 1.36–1.41)***	34.511	0.336 (0.010; 1.37–1.43)***	32.7658	0.337 (0.010; 1.37–1.43)***	32.434	0.359 (0.010; 1.40–1.46)***	34.2307	0.364 (0.010; 1.41–1.47)***	35.4574
		grade_level6	0.060 (0.006; 1.05–1.08)***	9.326	0.060 (0.007; 1.05–1.08)***	9.05751	0.060 (0.007; 1.05–1.08)***	9.00817	0.057 (0.007; 1.04–1.07)***	8.453	0.058 (0.007; 1.05–1.07)***	8.52783	0.060 (0.007; 1.05–1.08)***	8.86296
		grade_level7	0.098 (0.006; 1.09–1.12)***	15.413	0.098 (0.006; 1.09–1.12)***	15.27	0.106 (0.007; 1.10–1.13)***	14.6574	0.110 (0.008; 1.10–1.13)***	13.977	0.115 (0.008; 1.10–1.14)***	14.7031	0.115 (0.008; 1.11–1.14)***	14.9417
		grade_level8	0.170 (0.009; 1.16–1.21)***	19.086	0.170 (0.009; 1.16–1.21)***	18.9673	0.172 (0.009; 1.17–1.21)***	19.1028	0.172 (0.009; 1.17–1.21)***	18.777	0.176 (0.009; 1.17–1.21)***	19.2418	0.189 (0.009; 1.19–1.23)***	21.161
		grade_level9	0.278 (0.009; 1.30–1.34)***	31.513	0.278 (0.009; 1.30–1.34)***	31.0424	0.277 (0.009; 1.30–1.34)***	30.9851	0.280 (0.009; 1.30–1.35)***	30.482	0.280 (0.009; 1.30–1.35)***	30.651	0.296 (0.009; 1.32–1.37)***	33.0527
		year_quarter2020Q4	0.350 (0.011; 1.39–1.45)***	32.416	0.349 (0.011; 1.39–1.45)***	32.3813	0.348 (0.011; 1.39–1.45)***	32.2468	0.347 (0.011; 1.39–1.45)***	32.091	0.352 (0.011; 1.39–1.45)***	32.319	0.353 (0.011; 1.39–1.45)***	32.3878
		year_quarter2021Q1	0.517 (0.011; 1.64–1.71)***	48.764	0.516 (0.011; 1.64–1.71)***	48.6737	0.515 (0.011; 1.64–1.71)***	48.3467	0.511 (0.011; 1.63–1.70)***	47.66	0.518 (0.011; 1.64–1.72)***	46.7629	0.524 (0.011; 1.65–1.73)***	47.5599
		year_quarter2021Q2	0.500 (0.011; 1.61–1.68)***	46.241	0.499 (0.011; 1.61–1.68)***	46.0926	0.497 (0.011; 1.61–1.68)***	45.6477	0.490 (0.011; 1.60–1.67)***	44.321	0.497 (0.012; 1.61–1.68)***	41.9419	0.511 (0.012; 1.63–1.71)***	43.7515
		year_quarter2021Q3	0.522 (0.011; 1.65–1.72)***	47.471	0.537 (0.011; 1.67–1.75)***	47.7984	0.532 (0.011; 1.66–1.74)***	46.5209	0.524 (0.012; 1.65–1.73)***	44.542	0.519 (0.013; 1.64–1.72)***	39.6311	0.550 (0.013; 1.69–1.78)***	43.0707
		year_quarter2021Q4	0.957 (0.011; 2.55–2.66)***	89.205	0.971 (0.011; 2.58–2.70)***	88.2523	0.965 (0.011; 2.57–2.68)***	85.3719	0.955 (0.012; 2.54–2.66)***	80.907	0.885 (0.013; 2.36–2.48)***	67.9155	0.990 (0.013; 2.62–2.76)***	74.3696
		year_quarter2022Q1	1.476 (0.011; 4.28–4.47)***	138.618	1.490 (0.011; 4.34–4.53)***	135.628	1.484 (0.011; 4.31–4.51)***	130.826	1.473 (0.012; 4.26–4.47)***	122.232	1.424 (0.013; 4.05–4.26)***	112.347	1.515 (0.014; 4.43–4.68)***	107.24
		year_quarter2022Q2	0.448 (0.012; 1.53–1.60)***	36.853	0.462 (0.013; 1.55–1.63)***	36.8913	0.456 (0.013; 1.54–1.62)***	35.5093	0.441 (0.014; 1.51–1.60)***	32.199	0.403 (0.014; 1.46–1.54)***	29.0488	0.491 (0.016; 1.58–1.69)***	30.3575
		year_quarter2022Q3	0.145 (0.013; 1.13–1.19)***	11.027	0.159 (0.014; 1.14–1.20)***	11.6386	0.151 (0.014; 1.13–1.20)***	10.7723	0.137 (0.015; 1.11–1.18)***	9.106	0.111 (0.015; 1.09–1.15)***	7.41046	0.197 (0.018; 1.18–1.26)***	10.9385
		year_quarter2022Q4	0.387 (0.013; 1.43–1.51)***	29.374	0.400 (0.014; 1.45–1.53)***	28.9735	0.393 (0.014; 1.44–1.52)***	27.6727	0.379 (0.015; 1.42–1.51)***	24.545	0.363 (0.015; 1.40–1.48)***	23.6669	0.446 (0.019; 1.51–1.62)***	23.4859
		year_quarter2023Q1	0.516 (0.013; 1.63–1.72)***	38.313	0.529 (0.014; 1.65–1.75)***	37.0432	0.522 (0.015; 1.64–1.74)***	35.8772	0.509 (0.016; 1.61–1.72)***	31.67	0.500 (0.016; 1.60–1.70)***	31.1948	0.585 (0.020; 1.73–1.87)***	28.9002
		year_quarter2023Q2	0.447 (0.014; 1.52–1.61)***	31.762	0.460 (0.015; 1.54–1.63)***	30.5388	0.456 (0.015; 1.53–1.62)***	29.9348	0.442 (0.017; 1.50–1.61)***	25.995	0.436 (0.017; 1.50–1.60)***	25.5266	0.526 (0.022; 1.62–1.77)***	24.219
		year_quarter2023Q3	0.196 (0.015; 1.18–1.25)***	12.665	0.205 (0.016; 1.19–1.27)***	12.7798	0.202 (0.016; 1.19–1.26)***	12.496	0.184 (0.018; 1.16–1.25)***	10.166	0.185 (0.018; 1.16–1.25)***	10.0805	0.274 (0.023; 1.26–1.38)***	11.7589
		year_quarter2023Q4	0.445 (0.016; 1.51–1.61)***	28.624	0.454 (0.016; 1.53–1.63)***	27.8505	0.452 (0.016; 1.52–1.62)***	27.6726	0.433 (0.019; 1.49–1.60)***	23.317	0.435 (0.019; 1.49–1.60)***	22.6216	0.532 (0.024; 1.62–1.79)***	21.7546

## Sheet: S5 Main Results Gender
			Model 8 Gender Base		Model 9 Gender LM Interaction		Model 10 Gender LM Interaction Random Slope
RANDOM EFFECTS	School ID	Standard deviation of intercepts	0.5815		0.582		0.6422
	School ID	Standard deviation of time quarter slopes	0.3531		0.3519		0.3384
	School ID	Standard deviation of learning materials slopes	NA		NA		0.4684
	School ID	Standard deviation of gender slopes	NA		NA		0.4847
	School ID	Standard deviation of gender:learning materials slopes	NA		NA		0.6008
	School ID	Correlation between intercept and time quarter slopes	-0.54		-0.54		-0.46
	School ID	Correlation between intercept and learning materials slopes	NA		NA		-0.37
	School ID	Correlation between intercept and gender slopes	NA		NA		-0.39
	School ID	Correlation between intercept and gender:learning materials slopes	NA		NA		0.26
	School ID	Correlation between time quarter and learning materials slopes	NA		NA		-0.01
	School ID	Correlation between time quarter and gender slopes	NA		NA		-0.01
	School ID	Correlation between time quarter and gender:learning materials slopes	NA		NA		0.05
	School ID	Correlation between learning materials and gender slopes	NA		NA		0.47
	School ID	Correlation between learning materials and gender:learning materials slopes	NA		NA		-0.69
	School ID	Correlation between gender and gender:learning materials slopes	NA		NA		-0.71
FIXED EFFECTS			Log-odds (SE, CI)	z-value	Log-odds (SE, CI)	z-value	Log-odds (SE, CI)	z-value
		Baseline mental health service use (intercept)	-3.192 (0.017; 0.04–0.04)***	-183.756	-3.171 (0.029; 0.04–0.04)***	-110.33	-3.189 (0.030; 0.04–0.04)***	-107.464
		learn_materials			-0.005 (0.014; 0.97–1.02)	-0.356	-0.016 (0.018; 0.95–1.02)	-0.88619
		subject_guidelines1			-0.016 (0.018; 0.95–1.02)	-0.884	-0.025 (0.018; 0.94–1.01)	-1.33905
		gender1	-0.525 (0.020; 0.57–0.61)***	-26.648	-0.386 (0.037; 0.63–0.73)***	-10.496	-0.422 (0.039; 0.61–0.71)***	-10.7509
		gender1:learn_materials			-0.050 (0.020; 0.91–0.99)*	-2.468	-0.029 (0.025)	-1.13465
		subject_guidelines1:gender1			-0.115 (0.024; 0.85–0.94)***	-4.701	-0.112 (0.025; 0.85–0.94)***	-4.55237
		grade_level10	0.042 (0.013; 1.02–1.07)**	3.191	0.030 (0.022; 0.99–1.08)	1.342	0.031 (0.023; 0.99–1.08)	1.37227
		grade_level6	0.027 (0.011; 1.01–1.05)*	2.525	0.025 (0.012; 1.00–1.05)*	2.064	0.027 (0.012; 1.00–1.05)*	2.19135
		grade_level7	0.004 (0.011; 0.98–1.03)	0.416	-0.001 (0.018; 0.97–1.03)	-0.031	0.002 (0.019; 0.97–1.04)	0.09888
		grade_level8	-0.012 (0.013; 0.96–1.01)	-0.931	-0.013 (0.013; 0.96–1.01)	-0.995	0.003 (0.015; 0.97–1.03)	0.16755
		grade_level9	-0.001 (0.013; 0.97–1.03)	-0.074	-0.004 (0.014; 0.97–1.02)	-0.263	0.009 (0.016; 0.98–1.04)	0.56562
		year_quarter2020Q4	0.309 (0.015; 1.32–1.40)***	21.01	0.308 (0.015; 1.32–1.40)***	20.967	0.309 (0.015; 1.32–1.40)***	21.0737
		year_quarter2021Q1	0.424 (0.015; 1.48–1.57)***	28.615	0.423 (0.015; 1.48–1.57)***	28.541	0.424 (0.015; 1.48–1.57)***	28.7374
		year_quarter2021Q2	0.354 (0.016; 1.38–1.47)***	22.671	0.352 (0.016; 1.38–1.47)***	22.576	0.354 (0.016; 1.38–1.47)***	22.793
		year_quarter2021Q3	0.407 (0.016; 1.45–1.55)***	24.952	0.409 (0.017; 1.46–1.56)***	23.47	0.414 (0.017; 1.46–1.57)***	23.8852
		year_quarter2021Q4	0.793 (0.017; 2.14–2.28)***	47.571	0.795 (0.018; 2.14–2.29)***	44.77	0.803 (0.018; 2.16–2.31)***	45.6125
		year_quarter2022Q1	1.296 (0.017; 3.53–3.78)***	74.637	1.298 (0.018; 3.53–3.80)***	70.562	1.311 (0.018; 3.58–3.85)***	72.0846
		year_quarter2022Q2	0.232 (0.020; 1.21–1.31)***	11.543	0.233 (0.021; 1.21–1.32)***	11.128	0.243 (0.021; 1.22–1.33)***	11.7373
		grade_level10:gender1	0.669 (0.015; 1.89–2.01)***	43.273	0.573 (0.030; 1.67–1.88)***	19.278	0.567 (0.032; 1.66–1.88)***	17.7825
		grade_level6:gender1	0.079 (0.016; 1.05–1.12)***	4.859	0.060 (0.018; 1.02–1.10)***	3.312	0.071 (0.018; 1.03–1.11)***	3.81891
		grade_level7:gender1	0.200 (0.016; 1.18–1.26)***	12.37	0.149 (0.026; 1.10–1.22)***	5.723	0.185 (0.028; 1.14–1.27)***	6.67056
		grade_level8:gender1	0.413 (0.016; 1.47–1.56)***	26.004	0.413 (0.016; 1.47–1.56)***	25.979	0.419 (0.021; 1.46–1.58)***	20.1014
		grade_level9:gender1	0.596 (0.016; 1.76–1.87)***	38.084	0.577 (0.018; 1.72–1.84)***	32.758	0.575 (0.021; 1.70–1.85)***	26.9647
		gender1:year_quarter2020Q4	0.080 (0.022; 1.04–1.13)***	3.723	0.080 (0.022; 1.04–1.13)***	3.715	0.080 (0.022; 1.04–1.13)***	3.69759
		gender1:year_quarter2021Q1	0.170 (0.021; 1.14–1.23)***	8.099	0.169 (0.021; 1.14–1.23)***	8.078	0.169 (0.021; 1.14–1.23)***	8.05439
		gender1:year_quarter2021Q2	0.247 (0.021; 1.23–1.33)***	11.753	0.247 (0.021; 1.23–1.33)***	11.715	0.246 (0.021; 1.23–1.33)***	11.6805
		gender1:year_quarter2021Q3	0.145 (0.021; 1.11–1.20)***	6.906	0.187 (0.023; 1.15–1.26)***	8.104	0.186 (0.023; 1.15–1.26)***	8.00704
		gender1:year_quarter2021Q4	0.195 (0.020; 1.17–1.26)***	9.892	0.237 (0.022; 1.21–1.32)***	10.783	0.234 (0.022; 1.21–1.32)***	10.5908
		gender1:year_quarter2022Q1	0.179 (0.019; 1.15–1.24)***	9.547	0.221 (0.021; 1.20–1.30)***	10.442	0.216 (0.021; 1.19–1.29)***	10.1433
		gender1:year_quarter2022Q2	0.164 (0.021; 1.13–1.23)***	7.664	0.205 (0.023; 1.17–1.29)***	8.743	0.201 (0.024; 1.17–1.28)***	8.49385

## Sheet: S6 Odds Ratios Fixed
		Results from models converted to Odds Ratios with corresponding Confidence Intervals, given as OR (CI)
		MODEL 1	MODEL 2	MODEL 3	MODEL 3 - Covid	MODEL 3 - Municipality	Model 4	Model 5	Model 6	Model 7	Model 7 - Covid	Model 7 - Municipality	Model 8	Model 9	Model 10
	Baseline mental health service use (intercept)	0.03 (0.03–0.03)***	0.04 (0.03–0.04)***	0.04 (0.03–0.04)***	0.03 (0.03–0.04)***	0.04 (0.03–0.04)***	0.03 (0.03–0.03)***	0.03 (0.03–0.03)***	0.03 (0.03–0.03)***	0.03 (0.03–0.03)***	0.03 (0.03–0.03)***	0.03 (0.03–0.03)***	0.04 (0.04–0.04)***	0.04 (0.04–0.04)***	0.04 (0.04–0.04)***
	learn_materials1	NA	0.97 (0.95–0.99)**	0.97 (0.94–0.99)**	0.97 (0.95–1.00)*	0.93 (0.90–0.96)***	NA	NA	NA	NA	NA	NA	NA	1.00 (0.97–1.02)	0.98 (0.95–1.02)
	subject_guidelines1	NA	0.93 (0.90–0.95)***	0.92 (0.90–0.94)***	0.94 (0.92–0.96)***	0.92 (0.90–0.94)***	NA	0.92 (0.90–0.94)***	0.93 (0.91–0.95)***	0.93 (0.91–0.95)***	0.96 (0.94–0.98)***	0.93 (0.91–0.95)***	NA	0.98 (0.95–1.02)	0.98 (0.94–1.01)
	avg_time_with_learn_materials	NA	NA	NA	NA	NA	NA	1.00 (0.99–1.01)	1.02 (1.00–1.03)*	1.01 (0.99–1.04)	1.03 (1.01–1.06)*	0.95 (0.92–0.98)**	NA	NA	NA
	avg_time_with_learn_materials_squared	NA	NA	NA	NA	NA	NA	NA	0.99 (0.99–1.00)*	1.00 (0.99–1.00)	0.99 (0.98–1.00)**	1.02 (1.01–1.03)***	NA	NA	NA
	gender1	NA	NA	NA	NA	NA	NA	NA	NA	NA	NA	NA	0.59 (0.57–0.61)***	0.68 (0.63–0.73)***	0.66 (0.61–0.71)***
	gender1:learn_materials	NA	NA	NA	NA	NA	NA	NA	NA	NA	NA	NA	NA	0.95 (0.91–0.99)*	0.97 (0.92–1.02)
	subject_guidelines1:gender1	NA	NA	NA	NA	NA	NA	NA	NA	NA	NA	NA	NA	0.89 (0.85–0.94)***	0.89 (0.85–0.94)***
	avg_gender_centered	0.81 (0.77–0.86)***	0.81 (0.77–0.86)***	0.78 (0.73–0.83)***	0.78 (0.73–0.83)***	0.82 (0.77–0.87)***	0.82 (0.79–0.86)***	0.82 (0.79–0.86)***	0.82 (0.79–0.86)***	0.78 (0.75–0.82)***	0.78 (0.74–0.82)***	0.81 (0.77–0.85)***	NA	NA	NA
	grade_level10	1.44 (1.41–1.47)***	1.35 (1.31–1.40)***	1.35 (1.30–1.39)***	1.37 (1.32–1.42)***	1.37 (1.33–1.42)***	1.42 (1.39–1.44)***	1.39 (1.36–1.41)***	1.40 (1.37–1.43)***	1.40 (1.37–1.43)***	1.43 (1.40–1.46)***	1.44 (1.41–1.47)***	1.04 (1.02–1.07)**	1.03 (0.99–1.08)	1.03 (0.99–1.08)
	grade_level6	1.06 (1.04–1.08)***	1.05 (1.03–1.07)***	1.06 (1.04–1.08)***	1.06 (1.04–1.08)***	1.05 (1.04–1.07)***	1.06 (1.05–1.08)***	1.06 (1.05–1.08)***	1.06 (1.05–1.08)***	1.06 (1.04–1.07)***	1.06 (1.05–1.07)***	1.06 (1.05–1.08)***	1.03 (1.01–1.05)*	1.03 (1.00–1.05)*	1.03 (1.00–1.05)*
	grade_level7	1.09 (1.08–1.11)***	1.06 (1.04–1.09)***	1.08 (1.05–1.11)***	1.08 (1.05–1.11)***	1.08 (1.05–1.11)***	1.10 (1.09–1.12)***	1.10 (1.09–1.12)***	1.11 (1.10–1.13)***	1.12 (1.10–1.13)***	1.12 (1.10–1.14)***	1.12 (1.11–1.14)***	1.00 (0.98–1.03)	1.00 (0.97–1.03)	1.00 (0.97–1.04)
	grade_level8	1.19 (1.17–1.22)***	1.19 (1.16–1.22)***	1.21 (1.18–1.24)***	1.21 (1.18–1.24)***	1.22 (1.20–1.25)***	1.19 (1.16–1.21)***	1.18 (1.16–1.21)***	1.19 (1.17–1.21)***	1.19 (1.17–1.21)***	1.19 (1.17–1.21)***	1.21 (1.19–1.23)***	0.99 (0.96–1.01)	0.99 (0.96–1.01)	1.00 (0.97–1.03)
	grade_level9	1.32 (1.30–1.35)***	1.31 (1.28–1.34)***	1.32 (1.29–1.35)***	1.32 (1.29–1.35)***	1.33 (1.30–1.36)***	1.32 (1.30–1.34)***	1.32 (1.30–1.34)***	1.32 (1.30–1.34)***	1.32 (1.30–1.35)***	1.32 (1.30–1.35)***	1.34 (1.32–1.37)***	1.00 (0.97–1.03)	1.00 (0.97–1.02)	1.01 (0.98–1.04)
	year_quarter2020Q4	1.41 (1.38–1.44)***	1.41 (1.38–1.44)***	1.41 (1.38–1.44)***	1.41 (1.38–1.44)***	1.38 (1.35–1.42)***	1.42 (1.39–1.45)***	1.42 (1.39–1.45)***	1.42 (1.39–1.45)***	1.41 (1.39–1.45)***	1.42 (1.39–1.45)***	1.42 (1.39–1.45)***	1.36 (1.32–1.40)***	1.36 (1.32–1.40)***	1.36 (1.32–1.40)***
	year_quarter2021Q1	1.65 (1.62–1.69)***	1.65 (1.61–1.69)***	1.65 (1.61–1.69)***	1.64 (1.60–1.67)***	1.59 (1.55–1.63)***	1.68 (1.64–1.71)***	1.68 (1.64–1.71)***	1.67 (1.64–1.71)***	1.67 (1.63–1.70)***	1.68 (1.64–1.72)***	1.69 (1.65–1.73)***	1.53 (1.48–1.57)***	1.53 (1.48–1.57)***	1.53 (1.48–1.57)***
	year_quarter2021Q2	1.60 (1.56–1.64)***	1.60 (1.56–1.64)***	1.60 (1.56–1.64)***	1.58 (1.54–1.62)***	1.51 (1.46–1.56)***	1.65 (1.61–1.68)***	1.65 (1.61–1.68)***	1.64 (1.61–1.68)***	1.63 (1.60–1.67)***	1.64 (1.61–1.68)***	1.67 (1.63–1.71)***	1.42 (1.38–1.47)***	1.42 (1.38–1.47)***	1.42 (1.38–1.47)***
	year_quarter2021Q3	1.60 (1.56–1.65)***	1.64 (1.60–1.69)***	1.65 (1.60–1.69)***	1.60 (1.56–1.65)***	1.53 (1.46–1.59)***	1.69 (1.65–1.72)***	1.71 (1.67–1.75)***	1.70 (1.66–1.74)***	1.69 (1.65–1.73)***	1.68 (1.64–1.72)***	1.73 (1.69–1.78)***	1.50 (1.45–1.55)***	1.51 (1.46–1.56)***	1.51 (1.46–1.57)***
	year_quarter2021Q4	2.42 (2.35–2.49)***	2.47 (2.40–2.54)***	2.48 (2.41–2.55)***	2.41 (2.34–2.48)***	2.27 (2.15–2.39)***	2.60 (2.55–2.66)***	2.64 (2.58–2.70)***	2.62 (2.57–2.68)***	2.60 (2.54–2.66)***	2.42 (2.36–2.48)***	2.69 (2.62–2.76)***	2.21 (2.14–2.28)***	2.21 (2.14–2.29)***	2.23 (2.16–2.31)***
	year_quarter2022Q1	3.97 (3.85–4.09)***	0.00 (3.92–4.17)***	4.08 (3.96–4.21)***	4.03 (3.91–4.14)***	3.65 (3.44–3.88)***	4.38 (4.28–4.47)***	4.44 (4.34–4.53)***	4.41 (4.31–4.51)***	4.36 (4.26–4.47)***	4.15 (4.05–4.26)***	4.55 (4.43–4.68)***	3.66 (3.53–3.78)***	3.66 (3.53–3.80)***	3.71 (3.58–3.85)***
	year_quarter2022Q2	1.36 (1.31–1.41)***	0.00 (1.34–1.44)***	1.40 (1.35–1.45)***	1.40 (1.36–1.45)***	1.23 (1.15–1.32)***	1.57 (1.53–1.60)***	1.59 (1.55–1.63)***	1.58 (1.54–1.62)***	1.55 (1.51–1.60)***	1.50 (1.46–1.54)***	1.63 (1.58–1.69)***	1.26 (1.21–1.31)***	1.26 (1.21–1.32)***	1.28 (1.22–1.33)***
	year_quarter2022Q3	NA	NA	NA	NA	NA	1.16 (1.13–1.19)***	1.17 (1.14–1.20)***	1.16 (1.13–1.20)***	1.15 (1.11–1.18)***	1.12 (1.09–1.15)***	1.22 (1.18–1.26)***	NA	NA	NA
	year_quarter2022Q4	NA	NA	NA	NA	NA	1.47 (1.43–1.51)***	1.49 (1.45–1.53)***	1.48 (1.44–1.52)***	1.46 (1.42–1.51)***	1.44 (1.40–1.48)***	1.56 (1.51–1.62)***	NA	NA	NA
	year_quarter2023Q1	NA	NA	NA	NA	NA	1.67 (1.63–1.72)***	1.70 (1.65–1.75)***	1.69 (1.64–1.74)***	1.66 (1.61–1.72)***	1.65 (1.60–1.70)***	1.80 (1.73–1.87)***	NA	NA	NA
	year_quarter2023Q2	NA	NA	NA	NA	NA	1.56 (1.52–1.61)***	1.58 (1.54–1.63)***	1.58 (1.53–1.62)***	1.56 (1.50–1.61)***	1.55 (1.50–1.60)***	1.69 (1.62–1.77)***	NA	NA	NA
	year_quarter2023Q3	NA	NA	NA	NA	NA	1.22 (1.18–1.25)***	1.23 (1.19–1.27)***	1.22 (1.19–1.26)***	1.20 (1.16–1.25)***	1.20 (1.16–1.25)***	1.32 (1.26–1.38)***	NA	NA	NA
	year_quarter2023Q4	NA	NA	NA	NA	NA	1.56 (1.51–1.61)***	1.58 (1.53–1.63)***	1.57 (1.52–1.62)***	1.54 (1.49–1.60)***	1.54 (1.49–1.60)***	1.70 (1.62–1.79)***	NA	NA	NA
	grade_level10:gender1	NA	NA	NA	NA	NA	NA	NA	NA	NA	NA	NA	1.95 (1.89–2.01)***	1.77 (1.67–1.88)***	1.76 (1.66–1.88)***
	grade_level6:gender1	NA	NA	NA	NA	NA	NA	NA	NA	NA	NA	NA	1.08 (1.05–1.12)***	1.06 (1.02–1.10)***	1.07 (1.03–1.11)***
	grade_level7:gender1	NA	NA	NA	NA	NA	NA	NA	NA	NA	NA	NA	1.22 (1.18–1.26)***	1.16 (1.10–1.22)***	1.20 (1.14–1.27)***
	grade_level8:gender1	NA	NA	NA	NA	NA	NA	NA	NA	NA	NA	NA	1.51 (1.47–1.56)***	1.51 (1.47–1.56)***	1.52 (1.46–1.58)***
	grade_level9:gender1	NA	NA	NA	NA	NA	NA	NA	NA	NA	NA	NA	1.82 (1.76–1.87)***	1.78 (1.72–1.84)***	1.78 (1.70–1.85)***
	gender1:year_quarter2020Q4	NA	NA	NA	NA	NA	NA	NA	NA	NA	NA	NA	1.08 (1.04–1.13)***	1.08 (1.04–1.13)***	1.08 (1.04–1.13)***
	gender1:year_quarter2021Q1	NA	NA	NA	NA	NA	NA	NA	NA	NA	NA	NA	1.18 (1.14–1.23)***	1.18 (1.14–1.23)***	1.18 (1.14–1.23)***
	gender1:year_quarter2021Q2	NA	NA	NA	NA	NA	NA	NA	NA	NA	NA	NA	1.28 (1.23–1.33)***	1.28 (1.23–1.33)***	1.28 (1.23–1.33)***
	gender1:year_quarter2021Q3	NA	NA	NA	NA	NA	NA	NA	NA	NA	NA	NA	1.16 (1.11–1.20)***	1.21 (1.15–1.26)***	1.20 (1.15–1.26)***
	gender1:year_quarter2021Q4	NA	NA	NA	NA	NA	NA	NA	NA	NA	NA	NA	1.22 (1.17–1.26)***	1.27 (1.21–1.32)***	1.26 (1.21–1.32)***
	gender1:year_quarter2022Q1	NA	NA	NA	NA	NA	NA	NA	NA	NA	NA	NA	1.20 (1.15–1.24)***	1.25 (1.20–1.30)***	1.24 (1.19–1.29)***
	gender1:year_quarter2022Q2	NA	NA	NA	NA	NA	NA	NA	NA	NA	NA	NA	1.18 (1.13–1.23)***	1.23 (1.17–1.29)***	1.22 (1.17–1.28)***

## Sheet: S7 Variance Decomposition
Model		Variance	Std. Dev	Correlations				Covariances				Between-cluster Variances (at 2 Years)	Total Latent Variation at Reform Exposure (2 Years)	ICC 2 Years	Reform's Share of Total Cluster Variance	Reform's Share of Total Child Variance	Pearson's R (Intercept-LM/TWLM)
Effects of Learning Materials																			Variable	Values	Explanation
1. Base: changes over time and between grades	τ00 school_ID	0.333101	0.577149
	τ11 school_ID.time_quarter	0.124188	0.352403	-0.544012															T_Time_One_Quarter	0.25	0.25 = 2020Q3
2. Average effect of learning materials	τ00 school_ID	0.333337	0.577354																T_LM_NO	0	0 = no learning materials
	τ11 school_ID.time_quarter	0.123414	0.351303	-0.54355				-0.110246				0.386008	3.67588	0.105011					T_LM_YES	1	yes = learning materials
3. Learning materials-by-school interaction	τ00 school_ID	0.347729	0.589685																T_GENDER_MALE	0	0 = boys
	τ11 school_ID.time_quarter	0.114076	0.337751	-0.515362				-0.102643											T_GENDER_FEMALE	1	1 = girls
	τ11 school_ID.learn_materials (2020Q3)	0.121417	0.34845	-0.279573	0.0099382			-0.0574455	0.00116962			0.404664	3.69453	0.109531	0.300044	0.032864	-0.279573		T_COVID_NO	0	0 = no covid quarters
3. V2 Learning materials-by-school interaction, adjusted for Covid-19	τ00 school_ID	0.690621	0.831036																T_COVID_YES	1	1 = covid quarters
	τ11 school_ID.time_quarter	0.122128	0.349468	-0.694127				-0.201588											T_RES	3.28987	Residual variance
	τ11 school_ID.covid19	0.276407	0.525745	-0.734668	0.631263			-0.320986	0.115983
	τ11 school_ID.learn_materials	0.121031	0.347895	-0.157278	-0.0501871	-0.0413079		-0.0454711	-0.00610166	-0.00755538							-0.374007
	τ11 school_ID.learn_materials Covid-Adjusted											0.37846	3.28987	0.115038	0.319798	0.036789
3. V3 Learning materials-by-school interaction, adjusted for municipality	τ00 school_ID	0.271764	0.52131
	τ11 school_ID.time_quarter	0.0412104	0.203004	-0.710135				-0.075152
	τ11 school_ID.learn_materials	0.115057	0.339201	-0.262737	-0.132946			-0.0464594	-0.00915451			0.121518	3.41139	0.0356213	0.946831	0.0337274	-0.262737
	τ00 municipality_ID	0.0755016	0.274776
	τ11 municipality_ID.time_quarter	0.091239	0.302058	-0.552869				-0.0458871
	τ11 municipality_ID.learn_materials	0.00376884	0.0613909	-0.00130616	0.769748			-2.20333e-05	0.0142739			0.31773	3.6076	0.0880724	0.0118618	0.0010447	-0.00130616
Effects of Average Time with Learning Materials (TWLM)
4. Base: changes over time and between grades	τ00 school_ID	0.32655	0.5714
	τ11 school_ID.time_quarter	0.02069	0.1438	-0.49
5. Average effect of TWLM (linear)	τ00 school_ID	0.32758	0.5723
	τ11 school_ID.time_quarter	0.02071	0.1439	-0.49
6. Average effect of TWLM (linear and squared)	τ00 school_ID	0.32759	0.5724
	τ11 school_ID.time_quarter	0.02069	0.1438	-0.49
7. TWLM-by-school interaction	τ00 school_ID	0.33078	0.5751
	τ11 school_ID.time_quarter	0.03457	0.1859	-0.47				-0.0502594
	τ11 school_ID.TWLM-linear	0.14429	0.3799	-0.01	-0.31			-0.00218468	-0.0218942								-0.01
	τ11 school_ID.TWLM-squared	0.01271	0.1127	0.08	-0.02	-0.87		0.00518719	-0.00041923	-0.0372572							0.08
	TWLM linear + squared											0.183564	3.47343	0.0528479	0.449357	0.0237476
7. V2 TWLM-by-school interaction, adjusted for Covid-19	τ00 school_ID	0.83329	0.9128
	τ11 school_ID.time_quarter	0.0999	0.3161	-0.8				-0.230819
	τ11 school_ID.Covid19	0.32586	0.5708	-0.79	0.82			-0.411662	0.147949
	τ11 school_ID.TWLM-linear	0.13103	0.362	0.03	-0.24	-0.1		0.00991299	-0.0274587	-0.0206634							0.03
	τ11 school_ID.TWLM-squared	0.01029	0.1014	-0.02	0.08	0.17	-0.86	-0.00185198	0.00256496	0.00984401	-0.0315785						-0.02
	School TWLM linear + squared Covid-Adjusted											0.240682	3.53055	0.0681712	0.324756	0.022139
7. V3 TWLM-by-school interaction, adjusted for municipality	τ00 school_ID	0.196736	0.44355
	τ11 school_ID.time_quarter	0.028467	0.16872	-0.5				-0.0374182
	τ11 school_ID.TWLM-linear	0.131044	0.362	-0.17	-0.22			-0.027296	-0.013437								-0.17
	τ11 school_ID.TWLM-squared	0.010428	0.10212	0.39	-0.19	-0.88		0.0176647	-0.0032736	-0.0325306							0.39
	School TWLM linear + squared											0.110724	3.40059	0.0325602	0.690102	0.0224699
	τ00 municipality_ID	0.11531	0.33957
	τ11 municipality_ID.time_quarter	0.003521	0.05934	-0.7				-0.0141047
	τ11 municipality_ID.TWLM-linear	0.012507	0.11184	0.91	-0.94			0.0345582	-0.00623789								0.91
	τ11 municipality_ID.TWLM-squared	0.002017	0.04491	-0.89	0.88	-0.96		-0.013573	0.00234514	-0.00482171							-0.89
	Mun. TWLM linear + squared											0.10084	3.39071	0.0297402	0.0483991	0.0014394
Gender Differences in Effects of Learning Materials
8. Base: interaction between gender and time, and gender and grade	τ00 school_ID	0.3382	0.5815
	τ11 school_ID.time_quarter	0.1247	0.3531	-0.54
9. Interaction between learning materials and gender	τ00 school_ID	0.3388	0.582
	τ11 school_ID.time_quarter	0.1238	0.3519	-0.54
10. Interaction between learning materials and gender by school	τ00 school_ID	0.4124	0.6422
	τ11 school_ID.time_quarter	0.1145	0.3384	-0.46				-0.0999585
	τ11 school_ID.learn_materials	0.2194	0.4684	-0.37	-0.01			-0.111296	-0.00158497
	τ11 school_ID.gender	0.2349	0.4847	-0.39	-0.01	0.47		-0.121385	-0.00164
	τ11 school_ID.learn_materials:gender	0.361	0.6008	0.26	0.05	-0.69		0.10032	0.0101654	-0.20093							0.26
	τ11 school_ID.learn_materials:gender male											0.464204	3.75407	0.123653	0.777675	0.0961622
	τ11 school_ID.learn_materials:gender female											0.647046	3.93691	0.164354	0.557921	0.0916962

## Sheet: S8 School Structure Model Fit
Model	nobs	nschools	AIC	BIC	logLik	deviance	Df.residual
Model 3_0 Empty	70424	2443	243470	243790	-121700	243400	70389
Model 3A School Type	70424	2443	244124	244362	-122036	244072	70398
Model 3B Teachers per Student	70424	2443	244001	244221	-121976	243953	70400
Model 3C School Size (Deciles)	70424	2443	244119	244338	-122035	244071	70400
Model 3D Average Teacher Education	70424	2443	244140	244360	-122046	244092	70400
Model 3E Average Teacher Age	70424	2443	244105	244325	-122029	244057	70400
Model 3F Assistants to Non-Assistants Ratio	70424	2443	244028	244248	-121990	243980	70400
Model 3G Special Education to Non-Special Education Ratio	70424	2443	243650	243870	-121801	243602	70400
Model 3H Females to Male Teachers Ratio	70424	2443	244139	244359	-122046	244091	70400
Model 3I Any Asylum Seekers	70424	2443	244147	244367	-122050	244099	70400
Model 3J Any New Norwegian Education	70424	2443	244145	244365	-122049	244097	70400
Model 3K Any Mother Tongue or Bilingual Education	70424	2443	244146	244366	-122049	244098	70400
Model 3L Any Tailored Education	70424	2443	244147	244367	-122049	244099	70400
Model 3M Multivariate Model with all variables from Model 3A to 3L	70424	2443	243457	243896	-121680	243361	70376

## Sheet: S9 School Structure Interaction
	Pairwise Associations		Multivariate Associations		Pairwise Associations		Multivariate Associations
	Main Effects (School Structure) β (CI)	Interaction with Learning Materials β (CI)	Main Effects (School Structure) β (CI)	Interaction with Learning Materials β (CI)	Main Effects (School Structure) OR (CI)	Interaction with Learning Materials OR (CI)	Main Effects (School Structure) OR (CI)	Interaction with Learning Materials OR (CI)
School type combined (ref category: primary school)	-0.004 (-0.054 – 0.046)	-0.062** (-0.109 – -0.016)	-0.088*** (-0.138 – -0.039)	-0.089*** (-0.140 – -0.038)	0.996 (0.947 – 1.047)	0.940** (0.897 – 0.985)	0.916*** (0.871 – 0.962)	0.915*** (0.869 – 0.963)
School type secondary (ref category: primary school)	0.112*** (0.057 – 0.167)	-0.078** (-0.128 – -0.029)	0.043 (-0.030 – 0.115)	-0.134*** (-0.208 – -0.060)	1.118*** (1.059 – 1.181)	0.925** (0.880 – 0.971)	1.044 (0.970 – 1.122)	0.875*** (0.812 – 0.942)
Teacher per student ratio	1.355*** (1.121 – 1.589)	0.015 (-0.244 – 0.274)	0.912*** (0.599 – 1.225)	0.264 (-0.102 – 0.629)	3.875*** (3.067 – 4.897)	1.015 (0.784 – 1.316)	2.489*** (1.820 – 3.404)	1.302 (0.903 – 1.875)
School size decile	0.015*** (0.007 – 0.022)	0.007 (0.000 – 0.014)	0.029*** (0.019 – 0.039)	0.019*** (0.009 – 0.030)	1.015*** (1.007 – 1.023)	1.007 (1.000 – 1.015)	1.030*** (1.020 – 1.040)	1.019*** (1.009 – 1.030)
Teacher education	-0.039 (-0.109 – 0.032)	-0.062 (-0.127 – 0.004)	-0.032 (-0.116 – 0.052)	-0.076 (-0.164 – 0.012)	0.962 (0.897 – 1.032)	0.940 (0.881 – 1.004)	0.969 (0.890 – 1.054)	0.927 (0.849 – 1.012)
Teacher age	-0.015*** (-0.021 – -0.008)	-0.008** (-0.014 – -0.002)	-0.011*** (-0.017 – -0.005)	-0.003 (-0.010 – 0.003)	0.986*** (0.979 – 0.992)	0.992** (0.986 – 0.998)	0.989*** (0.983 – 0.995)	0.997 (0.990 – 1.003)
Assistants to non assistants ratio	0.553*** (0.449 – 0.656)	-0.031 (-0.129 – 0.068)	0.228*** (0.116 – 0.341)	-0.122* (-0.239 – -0.005)	1.738*** (1.567 – 1.927)	0.970 (0.879 – 1.070)	1.257*** (1.123 – 1.406)	0.885* (0.787 – 0.995)
Special education to non-special education ratio	2.078*** (1.890 – 2.266)	-0.028 (-0.231 – 0.175)	1.700*** (1.468 – 1.933)	0.070 (-0.182 – 0.321)	7.989*** (6.619 – 9.642)	0.972 (0.794 – 1.191)	5.476*** (4.339 – 6.911)	1.072 (0.834 – 1.379)
Teacher gender (female to male ratio)	-0.265** (-0.454 – -0.076)	0.030 (-0.149 – 0.210)	-0.089 (-0.296 – 0.117)	-0.156 (-0.373 – 0.060)	0.767** (0.635 – 0.927)	1.031 (0.862 – 1.233)	0.914 (0.744 – 1.124)	0.855 (0.689 – 1.062)
Any asylum seekers	0.007 (-0.048 – 0.063)	-0.003 (-0.052 – 0.046)	-0.022 (-0.072 – 0.027)	-0.005 (-0.054 – 0.044)	1.007 (0.953 – 1.065)	0.997 (0.949 – 1.047)	0.978 (0.930 – 1.028)	0.995 (0.947 – 1.045)
Any New Norwegian	-0.011 (-0.081 – 0.059)	-0.063 (-0.167 – 0.041)	0.000 (-0.102 – 0.103)	-0.077 (-0.181 – 0.026)	0.989 (0.922 – 1.061)	0.939 (0.846 – 1.042)	1.000 (0.903 – 1.109)	0.925 (0.835 – 1.026)
Any mother tongue or bilingual education	0.013 (-0.026 – 0.053)	0.007 (-0.028 – 0.043)	0.010 (-0.030 – 0.049)	-0.019 (-0.058 – 0.020)	1.013 (0.974 – 1.054)	1.007 (0.972 – 1.044)	1.010 (0.971 – 1.050)	0.981 (0.944 – 1.021)
Any tailored education	-0.007 (-0.063 – 0.050)	0.017 (-0.033 – 0.067)	-0.023 (-0.075 – 0.030)	0.020 (-0.032 – 0.072)	0.993 (0.939 – 1.051)	1.017 (0.967 – 1.069)	0.978 (0.928 – 1.030)	1.020 (0.969 – 1.075)

[truncated: 4 more sheets: S10 School Structure Base Vars, S11 Model Fitting Approach Exp., S12 Results 2015Q1-2023Q4, S13 Diagnoses]
